1 **tDCS modulates effective connectivity during motor command following; a potential**  
2 **therapeutic target for disorders of consciousness**

3 Davide Aloï<sup>1,2</sup>, Roya Jalali<sup>1,2</sup>, Penelope Tilsley<sup>1,3</sup>, R. Chris Miall<sup>1</sup>, Davinia Fernández-Espejo<sup>\*1,2</sup>

4 <sup>1</sup>*School of Psychology, University of Birmingham*

5 <sup>2</sup>*Centre for Human Brain Health, University of Birmingham*

6 <sup>3</sup>*Aix-Marseille Univ, CNRS, CRMBM, UMR 7339, Marseille, France*

7

8 **Correspondence:**

9 d.fernandez-espejo@bham.ac.uk

10

11 **Abstract**

12 Transcranial direct current stimulation (tDCS) is attracting increasing interest as a potential therapeutic  
13 route for unresponsive patients with prolonged disorders of consciousness (PDOC). However, research to  
14 date has had mixed results. Here, we propose a new direction by directly addressing the mechanisms  
15 underlying lack of responsiveness in PDOC, and using these to define our targets and the success of our  
16 intervention in the healthy brain first. We report 2 experiments that assess whether tDCS to the primary  
17 motor cortex (M1-tDCS; *Experiment 1*) and the cerebellum (cb-tDCS; *Experiment 2*) administered at rest  
18 modulate thalamo-cortical coupling in a subsequent command following task typically used to clinically  
19 assess awareness. Both experiments use sham- and polarity-controlled, randomised, double-blind,  
20 crossover designs. In *Experiment 1*, 22 participants received anodal, cathodal, and sham M1-tDCS  
21 sessions while in the MRI scanner. A further 22 participants received the same protocol with cb-tDCS in  
22 *Experiment 2*. We use Dynamic Causal Modelling of fMRI to characterise the effects of tDCS on brain  
23 activity and dynamics during simple thumb movements in response to command. We found that M1-tDCS  
24 increased thalamic excitation and that Cathodal cb-tDCS increased excitatory coupling from thalamus to  
25 M1. All these changes were polarity specific. Combined, our experiments demonstrate that tDCS can  
26 successfully modulate long range thalamo-cortical dynamics during command following via targeting of  
27 cortical regions. This suggests that M1- and cb-tDCS may allow PDOC patients to overcome the motor  
28 deficits at the root of their reduced responsiveness, improving their rehabilitation options and quality of life  
29 as a result.

30

31 **Keywords:** tDCS; PDOC; fMRI; connectivity, motor network; consciousness.

## 32           1. Introduction

33    Transcranial direct current stimulation (tDCS) is a non-invasive brain stimulation technique that is gaining  
34    popularity as a therapeutic option for complex clinical conditions for which no other alternatives are  
35    available[1]. Among these, a paradigmatic case is that of prolonged disorders of consciousness (PDOC),  
36    such as the vegetative (VS) and the minimally conscious state (MCS). PDOC are characterised by  
37    catastrophic disabilities that are in many cases permanent[2], and the small number of therapies available  
38    have demonstrated very limited success at improving outcome[3]. In response to this, over the last 5  
39    years the field has seen a sharp rise in tDCS trials on PDOC[4]. These have typically targeted the left  
40    dorso-lateral prefrontal cortex (DLPFC), in an attempt to restore some residual level of awareness, but  
41    have only had mixed success. While several studies reported the emergence of new behaviours  
42    indicative of awareness in subsets of PDOC patients following tDCS (see e.g.[5]), many others have  
43    failed to elicit any clinical changes or indeed led to undesired changes[6]. Individual responses to tDCS  
44    are well known for their heterogeneity even in healthy populations[7], and we can expect an even higher  
45    variability in PDOC, where the specific aetiology and mechanisms of damage result in marked differences  
46    in brain atrophy and tissue microstructure across patients. However, in this particular case, we argue that  
47    these difficulties are further exacerbated by our limited understanding of how conscious awareness is  
48    supported in the brain, which preclude the identification of effective targets for stimulation. Indeed, while  
49    we know that consciousness requires sustained rich neural dynamics in fronto-parietal and thalamo-  
50    cortical networks[8,9], the specific pattern of activity that would need to be restored in PDOC patients and  
51    how this can inform the selection of stimulation targets remains an elusive question.

52    Here we propose a different approach, wherein we switch the focus from the consciousness disorder  
53    itself to the patients' ability to produce voluntary behavioural responses[10]. In doing so, we target a  
54    cognitive process that is much better understood, not only in terms of its neurophysiology but also which  
55    specific tDCS modulations can maximise behavioural changes[7]. In addition, recent voices have  
56    emphasised the importance of addressing the fundamentals of any tDCS intervention in well-controlled  
57    studies in healthy individuals before a clinical application with meaningful effects can be produced and  
58    clinically tested[7]. In line with this, we thus focus on characterizing tDCS responses in the healthy brain,  
59    while keeping our methods translatable to PDOC patients. Clinical assessments of PDOC use the  
60    patient's ability to follow commands as a proxy measure for their awareness. Crucially, it is well known  
61    that a significant number of PDOC patients retain a much greater deal of awareness than can be  
62    expected from their clinical diagnosis and are simply unable to demonstrate this with overt purposeful  
63    (motor) responses in response to commands[10,11]. We have recently shown that this lack of behavioural  
64    responsiveness is associated with specific impairments within the motor system that result in reduced  
65    excitatory coupling between the thalamus and the primary motor cortex (M1)[12,13]. On this basis we  
66    hypothesise that interventions to enhance the flow of information between the thalamus and motor  
67    cortices will provide patients with a renewed level of control over their external behaviour and increase  
68    their behavioural responsiveness as a result.

69 In this study, we use dynamic causal modelling (DCM) of fMRI data to explore whether tDCS can indeed  
70 modulate motor thalamo-cortical coupling during simple voluntary responses to command in the healthy  
71 brain. We report two separate experiments targeting M1 and the cerebellum respectively. While there is  
72 strong evidence that tDCS applied to M1 (henceforth referred to as M1-tDCS) leads to local polarity-  
73 specific changes in M1 excitability[14] and BOLD signal[15], little is known about whether it can also  
74 influence coupling between other nodes of the motor network. Similarly, there is evidence that cerebellar  
75 tDCS (cb-tDCS) is able to modulate cerebellar brain inhibition (CBI)[16], the natural inhibitory tone the  
76 cerebellum exerts over M1. Given that the cerebellum is structurally connected to M1 via a thalamic relay,  
77 it would follow that the previously reported effects of cb-tDCS on CBI should be mediated by the  
78 thalamus. However, no studies have directly investigated how cb-tDCS affects the coupling in this  
79 cerebellar-thalamo-M1 axis. Furthermore, no study to date has assessed the effects of either M1- or cb-  
80 tDCS on the activity and dynamics of the motor network *during* simple motor command-following. We  
81 hypothesised that: (a) anodal M1-tDCS will increase excitation in the motor network and lead to an  
82 increased excitatory output from thalamus to M1 during command-following (*Experiment 1*); and (b)  
83 cathodal cb-tDCS will reduce inhibition in the thalamus and also result in increased excitation from  
84 thalamus to M1 (*Experiment 2*). Previous research has identified a relative structural preservation of M1-  
85 striatal-thalamic and dentate-thalamic pathways in PDOC patients[13]. This suggests that both pathways  
86 may be viable routes to target the thalamus in this group.

87

## 88 **2. Material and methods**

### 89 **2.1 Participants**

90 Forty-nine right-handed healthy volunteers participated in the study (15 men, 34 women; mean age  $25 \pm 4$   
91 years). We recruited all participants from the University of Birmingham, using the local Research  
92 Participation Scheme and advertisements across campus. We pre-screened all participants before  
93 recruitment to confirm their eligibility to safely take part in MRI and tDCS experiments. All reported no  
94 previous history of neurological and/or psychiatric disorders, no personal or family history of epilepsy, no  
95 use of psychoactive drugs, and had normal or corrected vision. Additionally, we instructed them to be well  
96 hydrated and well slept, with no alcohol or coffee consumed during the 24 hours prior to the testing  
97 session, to be in keeping with brain stimulation safety regulations.[17] The University of Birmingham's  
98 Science, Technology, Engineering and Mathematics Ethical Review Committee approved the study and  
99 all participants gave written informed consent prior participation. We compensated participants with £110  
100 or the equivalent in course credits.

101 *Experiment 1* included 26 participants (8 male, 18 female; mean age  $23 \pm 4$  years), from whom 22  
102 completed all 3 sessions. We further discarded data from one participant due to failure to comply with the  
103 task instructions, resulting in a final sample of 21 to be included in the analysis (8 male, 13 female; mean  
104 age mean:  $23 \pm 4$  years).

105 *Experiment 2* included 23 participants (7 male, 16 female; mean age:  $27 \pm 4$  years), from whom 22  
106 completed all 3 sessions. We excluded one further participant due to an acquisition error in one of the  
107 sessions that resulted in corrupted files. The final sample consisted of 7 males and 14 females, aged  $27 \pm$   
108 4 years. One participant took part in both Experiments (with a gap of over 7 weeks between them).

109

## 110 **2.2 General Experimental procedure**

111 Both experiments used sham- and polarity-controlled, randomised, double-blind, crossover designs. All  
112 participants completed anodal, cathodal, and sham stimulation sessions, while in the MRI scanner. These  
113 were scheduled at least 7 days apart (*Experiment 1*: mean  $12 \pm 10$ ; *Experiment 2*: mean  $13 \pm 7$ ), and in a  
114 counterbalanced order. Both the participants and the researchers conducting the data analyses were  
115 blind to the polarity in each session.

116 In their first testing session participants provided informed consent for the study and completed the  
117 Edinburgh handedness inventory[18]. Additionally, before each session, we pre-screened participants to  
118 confirm MRI and tDCS safety. After completing these steps, we set up the electrodes in a designated  
119 room (see below), and took the participants to the MRI scanner, where we completed the setup of the  
120 tDCS system and provided the participants with a joystick to record their responses in the fMRI task (see  
121 below). We used the MRI Intercom system to communicate with participants during the experiment.  
122 Before and after the stimulation, participants performed an fMRI motor command-following task where  
123 they were instructed to execute discrete simple thumb movements (abduction-adduction) with their right  
124 hand in response to auditory cues (see fMRI paradigm below).

125 Finally, to test whether our protocol achieved adequate blinding, participants completed a post-tDCS  
126 perceptual scale of their perceived sensations and/or discomfort after each session, and indicated  
127 whether they thought they received actual stimulation or sham.

128

## 129 **2.3 Electrical Stimulation**

130 In both experiments we administered tDCS in the MRI scanner using an MR-compatible NeuroConn DC-  
131 Stimulator MR (neuroCare Group GmbH, Germany). We used  $5 \times 5 \text{ cm}^2$  electrodes with electro-conductive  
132 paste to improve conduction and secured them in place using self-adhesive bandage.

133 *Experiment 1*. In line with previous studies targeting M1[14], in the anodal sessions we placed the target  
134 electrode (anode) centred on the left motor hotspot, as identified by TMS prior to the first MRI session,  
135 and oriented approximately at a  $45^\circ$  angle with respect to the midline. We placed the reference electrode  
136 (cathode) on the contralateral supraorbital region. We reversed this montage for the cathodal sessions.  
137 Half of the sham sessions replicated the anodal montage and the other half the cathodal montage. We  
138 used a Magstim BiStim<sup>2</sup> TMS stimulator paired with Brainsight TMS navigation system (Rogue Research

139 Inc) to identify the motor hotspot in each participant in the first stimulation session, following standard  
140 methods[19].

141 *Experiment 2.* We placed the target electrode on the right cerebellar cortex (3 centimetres lateral to the  
142 inion, oriented parallel to the midline) and the return electrode on the right buccinator muscle[20]. The  
143 montage was reversed for anodal and cathodal sessions. As above, half of the sham sessions replicated  
144 the anodal montage and the other half the cathodal montage.

145 In both experiments, we used Brainsight to record the coordinates for the target electrode in the first  
146 session and used them to locate the electrode position for the subsequent sessions to ensure consistent  
147 placement.

148 During anodal and cathodal sessions, we delivered 20 minutes of stimulation, with 30 seconds of ramp-up  
149 and ramp-down periods. During sham, we delivered 30 seconds of stimulation before ramping down to  
150 give the sensation of active stimulation, and according to well established protocols to ensure  
151 blinding[21]. In *Experiment 1* we stimulated at an intensity of 1mA, as this typically induces tDCS  
152 canonical excitatory versus inhibitory effects for anodal and cathodal stimulation respectively[7, 14]. In  
153 *Experiment 2*, we stimulated at an intensity of 1.85mA as previously recommended[22]. In both studies,  
154 we delivered stimulation at rest, without the participant engaging in any motor (or other type of) task, as  
155 performing a task during stimulation would not be feasible in PDOC patients themselves.

156

## 157 **2.4 MRI acquisition**

158 We acquired all data on a Philips Achieva 3T system, with a 32-channel head coil, at the Birmingham  
159 University Imaging Centre (BUIC).

160 *Experiment 1.* fMRI acquisition parameters were as follows: 160 volumes per run, 34 slices, TR =  
161 2000ms, TE = 35ms, matrix size = 80x80, voxel size = 3x3x3mm, no gap, and flip angle = 79.1°,  
162 SENSE acceleration factor = 2. Additionally, we acquired a high-resolution, T1-weighted MPRAGE image,  
163 for anatomical co-registration, with the following parameters: TR = 7.4ms, TE = 3.5ms, matrix size =  
164 256x256mm, voxel size = 1x1x1mm, and flip angle = 7°.

165 *Experiment 2.* fMRI acquisition parameters were as follows: 119 volumes per run, 46 slices, TR =  
166 2700ms, TE = 35ms, matrix size = 80x80, voxel size = 3x3x3, no gap, flip angle = 79.1°, SENSE  
167 acceleration factor = 2. High-resolution, T1-weighted MPRAGE images were also acquired for Experiment  
168 2, with the following parameters: TR = 7.4ms, TE = 3.5ms, matrix size = 256x256, voxel size = 1x1x1, and  
169 flip angle = 7°.

170 In both Experiments we collected other anatomical data as well as resting state fMRI before, during, and  
171 after stimulation, but we did not analyse these within the current study, and we will report them in  
172 separate papers.

173

174

## 175 **2.5 fMRI paradigm**

176 We instructed participants to perform a thumb adduction-abduction movement as fast as they could in  
177 response to auditory cues (beeps). The use of a simple task enables both the direct translation of this  
178 paradigm to PDOC patients as well as the study of tDCS-induced activation changes independent of  
179 modulations of performance. We presented the beeps in blocks cued by the word 'move' and  
180 interspersed with blocks in which the participant was instructed to rest (cued by the word 'relax'). Each  
181 'move' block included 7 beeps presented at a variable interstimulus interval (range 2-3 seconds), in order  
182 to avoid prediction effects. The task included 8 blocks of each type, each with a duration of 20 seconds,  
183 and for a total duration of 5 minutes and 20 seconds. We instructed the participants to maintain fixation  
184 on a white cross displayed in the centre of a black screen throughout the full duration of the task. This, as  
185 well as the instructions at the start of the task ("*Start moving your thumb as quickly as you can every time*  
186 *you hear a beep. Stay still when you hear "relax". Make sure you keep looking at the fixation cross at all*  
187 *times*") were presented via a digital system (Barco F35 AS3D, Norway) that projected the image onto a  
188 mirror fixed to the head coil at a visual angle of  $\sim 10^\circ$ . We delivered all auditory cues with an MR-  
189 compatible high-quality digital sound system incorporating noise-attenuated headphones (Avotec Silent  
190 Scan®). During 'move' blocks, we recorded thumb movements with an MRI compatible joystick (FORP-  
191 932, Current designs INC., PA USA), using 1200 Hz sampling frequency of x and y positions. To facilitate  
192 use of the joystick inside the MRI bore, the device was connected to the interface in the control room  
193 through an optical cable. For each session, we stabilised the joystick on the participant's torso and  
194 stabilised their right thumb using tape. To ensure accurate recordings, we calibrated the joystick before  
195 starting the experiment in each session. We used MATLAB 2015b on a Windows 7 computer to deliver all  
196 task stimulus and record motion tracking. See Fig. 1.

### Simulation of tDCS-induced current for Experiment 1 and Experiment 2

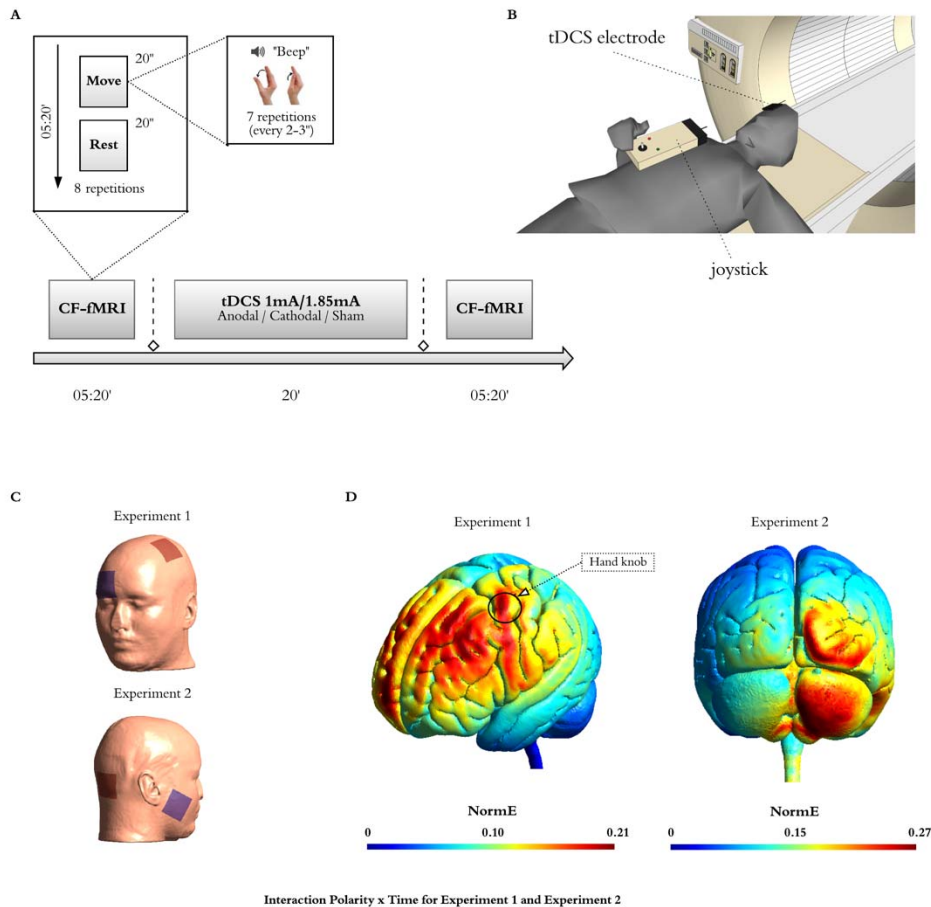

**Fig. 1. Experimental Design and tDCS montages.**

Experimental design. (A) Participants performed a simple behavioural command following task in the MRI scanner (CF-fMRI) before and after receiving 20 minutes of tDCS, whereby they move their right thumb in response to auditory cues (beeps). The task alternated 8 blocks of movement interspersed with rest blocks (all blocks were 20 seconds long for a total of 5 minutes 20 seconds). The beginning of each block was cued by the auditory words 'move' (movement blocks) or 'relax' (rest blocks). In each 'move' block the participants were instructed to perform 7 discrete thumb adduction-abduction movements as fast as they could in response to beeps that appeared at intervals ranging from 2-3 seconds, and while keeping their gaze fixated on a fixation cross displayed in the centre of a black screen. Their movements were recorded with an MRI compatible joystick, using 1200 Hz sampling frequency of x and y positions (B). All participants received anodal, cathodal, and sham stimulation sessions in a counterbalanced order at least 7 days apart. In Experiment 1, we used a montage that targeted the left primary motor cortex (M1) with the reference electrode over the contralateral supraorbital region, and delivered our stimulation at 1mA (C, top inset). We used TMS to identify the best placement (motor hotspot) of the active electrode in each participant. In Experiment 2, our montage targeted the right cerebellar cortex, with a reference electrode over the right buccinator muscle, and delivered our stimulation at 1.85mA (C, bottom inset). (D) Computational model showing the electric field distributions in Experiment 1 (left) and Experiment 2 (right), as calculated with SimNIBS3.2.2 on the MNI standard head model. For the purpose of this simulation, in Experiment 1, we placed the active electrode on C3 to approximate the location of the motor hotspot in our participants (marked as hand knob in the figure), and the passive electrode on Fp2. In Experiment 2, we placed the active electrode on I2 and the passive electrode over the right buccinator muscle. Note that this model does not consider individual differences in the position of the electrodes or the different tissue compartments across individual participants and therefore it should be interpreted as an estimate of the canonical field distribution to be expected with our montages.

197  
198

199  
200  
201  
202  
203  
204  
205  
206  
207  
208  
209  
210  
211  
212  
213  
214  
215  
216  
217  
218

219

## 220 **2.6 fMRI preprocessing and GLM analysis**

221 We used SPM12 on MATLAB 2015b ([www.fil.ion.ucl.ac.uk/spm](http://www.fil.ion.ucl.ac.uk/spm)) for the preprocessing and analysis of  
222 both fMRI datasets.

223 Each dataset was analysed independently but following the same pipeline, as described here. We first  
224 followed a standard spatial pre-processing, including realignment, co-registration between the structural  
225 and functional data sets, spatial normalization, and smoothing with an 8mm fwhm Gaussian kernel).  
226 Additionally, in order to remove potential undesirable effects of physiological noise or participant's motion  
227 in the activation maps, we performed single-subject independent component analysis (ICA)[23] and then  
228 applied FMRIB's ICA- based X-noiseifier (FIX)[24,25] to identify artefactual components and remove them  
229 from our fMRI data. We first classified manually all components from a subset of datasets (18 in  
230 *Experiment 1* and 23 in *Experiment 2*), ensuring an even coverage of all possible combinations of  
231 sessions, times, and polarities. Then, we used these manual labels to train a classifier for each of the  
232 studies that we then applied to the remaining datasets in that study. In order to test the accuracy of the  
233 automatic component classification, two of the authors (D.F-E for *Experiment 1* and D.A. for *Experiment*  
234 *2*) independently classified a number of components in the training set (8 datasets for *Experiment 1* and  
235 10 datasets for *Experiment 2*) and cross-checked their manual classification against the automatic  
236 classifications performed by FIX. There was a 100% match for 'bad' components between the manual  
237 and automatic classification lists.

238 We performed single-participant fixed-effect analyses using a general linear model in which we modelled  
239 each scan to belong to the motor execution (i.e. blocks of thumb movements) or the rest condition. The  
240 model also included the realignment factors as effects of non-interest to account for residual motion-  
241 related variance. We used high-pass filtering with a cut-off period of 80 seconds to remove slow-signal  
242 drifts from the time series. We then set linear contrasts to obtain estimates of the effects of interest for  
243 each subject, polarity, and time. Finally, in order to test the effects of tDCS on brain activation, we  
244 performed a second level full factorial analysis with polarity (anodal, cathodal, and sham) and time  
245 (before and after tDCS) as factors (total number of sessions = 126 for *Experiment 1* and 126 for  
246 *Experiment 2*). When the interaction was significant, we also performed the corresponding pairwise  
247 interactions to study the direction of the effects. We report statistically significant voxels as being those  
248 that survive an uncorrected  $p < .0001$  at the voxel level, on the following regions of interest: left  
249 supplementary motor area (SMA), left precentral gyrus, left thalamus, and right cerebellar lobes IV-V and  
250 VIII[26], using WFU PickAtlas. We did not include spurious activation, defined as a contrast returning a  
251 single significant voxel. We obtained these regions of interest from the Automated Anatomical Labeling  
252 atlas[27]. In *Experiment 1*, we had to exclude one participant from the ANOVA due to an acquisition error  
253 in one of the sessions that resulted in the most superior slices of the brain being cropped (losing a small  
254 section of M1). Note however that this issue did not affect the VOI analyses for the DCM (see section  
255 below) and therefore this participant was included in the DCM analyses. See full analysis pipeline in Fig.  
256 2.



257

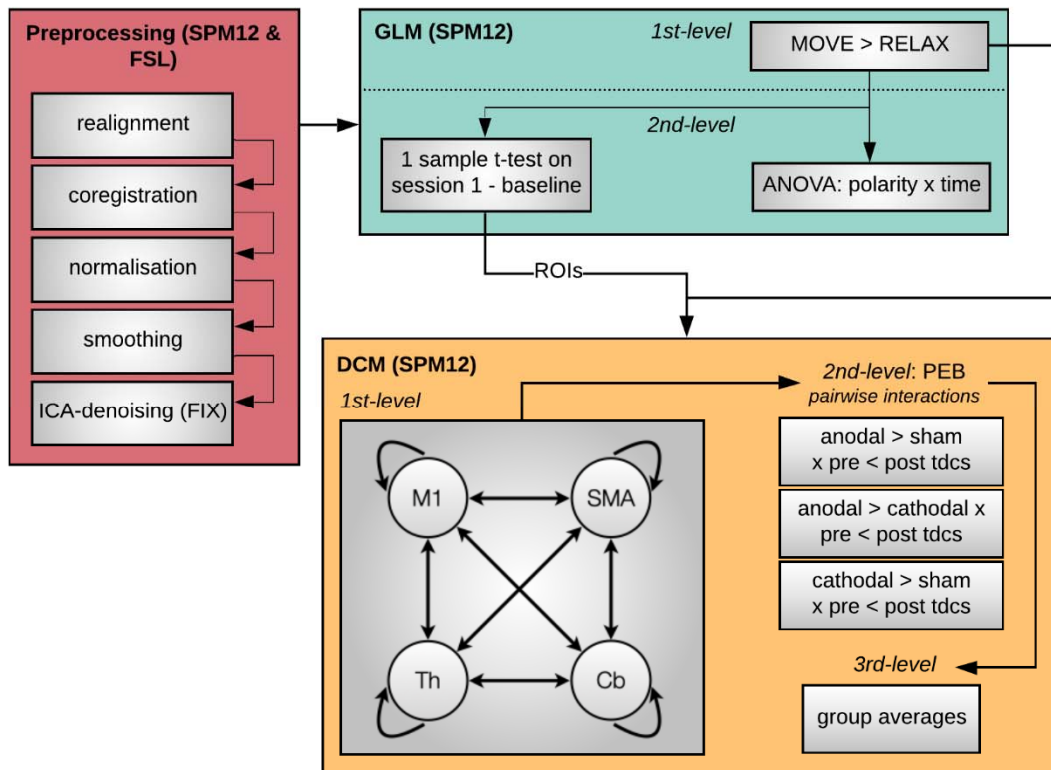

258  
259

**Fig. 2. Analysis pipeline.**

260 Analysis pipeline. We followed a standard pre-processing protocol (red panel), followed by fixed-effect general linear model analysis  
 261 to model the effect of thumb movements in each individual participant (1st-level, green panel). We then conducted a second level  
 262 full factorial analysis to test the effects of tDCS on brain activation (green panel). In addition, we performed a second-level one-  
 263 sample t-test on the pre-stimulation run acquired in the first chronological session for each participant to characterise the canonical  
 264 activation in the task, and define coordinates for the subsequent dynamic causal modelling (DCM) analyses. Finally, we used DCM  
 265 to assess the effects of tDCS on the causal dynamics within our network of interest (yellow panel). We first built and estimated a  
 266 fully connected model including left M1, left SMA, left thalamus, and right cerebellum in each participant. Then we applied  
 267 Parametric Empirical Bayes (PEB) to model each of the three pairwise interactions between polarity and time (i.e., interaction  
 268 between pre-/post-tDCS and either anodal/cathodal, cathodal/sham, anodal/sham) in each participant (2nd-level, yellow panel).  
 269 Finally, we created a 3rd-level PEB for each pairwise interaction modelling the average effect across participants. Note that we  
 270 conducted data analysis for each Experiment individually but following the same protocol, as described above.  
 271

## 272 2.7 DCM analysis

### 273 *Region selection and timeseries extraction*

274 DCM is a framework for Bayesian modelling of brain dynamics, which allows the inference of hidden  
 275 (unobserved) neuronal states from measured brain activity [28]. First, to obtain the canonical pattern of  
 276 activity on our task for the group in each experiment, we performed second-level one-sample t-tests on  
 277 the individual contrasts corresponding to the pre-stimulation run acquired in the first chronological session  
 278 for each participant (Fig. 3). In the resulting map, we identified the group peak of activation for the

279 clusters corresponding to the left M1, SMA, left thalamus, and right cerebellum at an uncorrected  $p < 0.001$   
280 (in bold in Table 1). This group-derived coordinates then served as a starting point for searching a nearby  
281 local maximum in each individual run. Each of these run-specific local maxima was constrained to be a  
282 maximum of 15mm away from the group level peak for the left M1, SMA, and right cerebellum ROIs and a  
283 maximum of 9mm away for the left thalamus ROI, and had to exceed a liberal statistical threshold of  
284  $p < 0.05$ [28]. The differences in the allowed distance from the group peak accommodated for differences in  
285 size of the anatomical boundaries of each region. As recently recommended, when this threshold failed to  
286 produce a peak for that region, we iteratively reduced the threshold in 0.05 increments until reaching  
287 0.25. When no peak could be found even at this threshold, we used the original group derived  
288 coordinates, as typically done[29]. Note that we only used these liberal thresholds for the identification of  
289 coordinates to extract our timeseries (feature selection) but not for any statistical analyses. Having  
290 identified individual peak coordinates for each run, we extracted timeseries from 4mm radius spherical  
291 volumes of interest centred on them.  
292

293

**Table 1. Canonical activation during command-following**

|                     | Region            | Cluster P            | Cluster size  | Peak P             | T     | MNI coordinates     |
|---------------------|-------------------|----------------------|---------------|--------------------|-------|---------------------|
|                     |                   | <i>FWE-corrected</i> | <i>in mm3</i> | <i>uncorrected</i> |       | <i>[x;y;z]</i>      |
| <b>Experiment 1</b> | M1                | <0.001               | 6264          | <0.001             | 6.770 | <b>[-33;-13;62]</b> |
|                     |                   |                      |               | <0.001             | 6.767 | [-33;-19;56]        |
|                     |                   | 0.966                | 81            | <0.001             | 4.751 | [-15;-4;68]         |
|                     |                   | 0.903                | 162           | <0.001             | 4.704 | [-57;5;29]          |
|                     |                   | 0.927                | 135           | <0.001             | 4.324 | [-54;5;14]          |
|                     | SMA               | <0.001               | 6426          | <0.001             | 8.703 | <b>[0;-7;65]</b>    |
|                     | Thalamus          | 0.260                | 864           | <0.001             | 6.330 | <b>[-12;-22;5]</b>  |
|                     | <i>Cerebellum</i> | 0.022                | 2187          | <0.001             | 7.137 | <b>[15;-55;-22]</b> |
| <b>Experiment 2</b> | M1                | 0.326                | 702           | <0.001             | 5.066 | <b>[-24;-19;74]</b> |
|                     |                   | 0.983                | 81            | <0.001             | 4.565 | [-54;5;14]          |
|                     |                   | 0.983                | 81            | <0.001             | 4.251 | [-15;-4;68]         |
|                     |                   | 0.195                | 918           | <0.001             | 4.107 | [-42;-19;56]        |
|                     |                   |                      |               | <0.001             | 4.085 | [-36;-28;65]        |
|                     |                   |                      |               | <0.001             | 3.957 | [-33;-25;53]        |
|                     |                   | 0.983                | 81            | 0.001              | 3.795 | [-39;-7;47]         |
|                     |                   | 0.997                | 27            | 0.001              | 3.606 | [-33;-22;47]        |
|                     | SMA               | <0.001               | 5481          | <0.001             | 7.087 | <b>[-3;-4;65]</b>   |
|                     |                   |                      |               | <0.001             | 6.178 | [-12;-4;74]         |
|                     |                   |                      |               | <0.001             | 5.345 | [-9;-1;53]          |
|                     | Thalamus          | 0.505                | 513           | <0.001             | 4.352 | <b>[-18;-16;14]</b> |
|                     |                   |                      |               | <0.001             | 4.153 | [-9;-22;5]          |
|                     | <i>Cerebellum</i> | 0.003                | 3024          | <0.001             | 8.799 | <b>[12;-55;-25]</b> |
|                     |                   |                      |               | <0.001             | 7.671 | [18;-49;-19]        |
|                     |                   |                      |               | <0.001             | 5.159 | [24;-43;-31]        |
|                     |                   | 0.001                | 3915          | <0.001             | 7.285 | [24;-58;-46]        |
|                     |                   |                      |               | <0.001             | 7.255 | [12;-73;-46]        |
|                     |                   |                      |               | <0.001             | 6.467 | [6;-67;-31]         |

294

295

296

297

Results from the random effect group analyses on the brain activation during thumb movements to command in the baseline run for the first session. Results survived a threshold of uncorrected  $p < 0.001$ . We highlight in bold the coordinates that we subsequently used as a starting point to search for individual coordinates to extract time series for the DCM. Abbreviations: FWE, family wise error; MNI, Montreal Neurological Institute; M1, primary motor cortex; SMA, supplementary motor area.

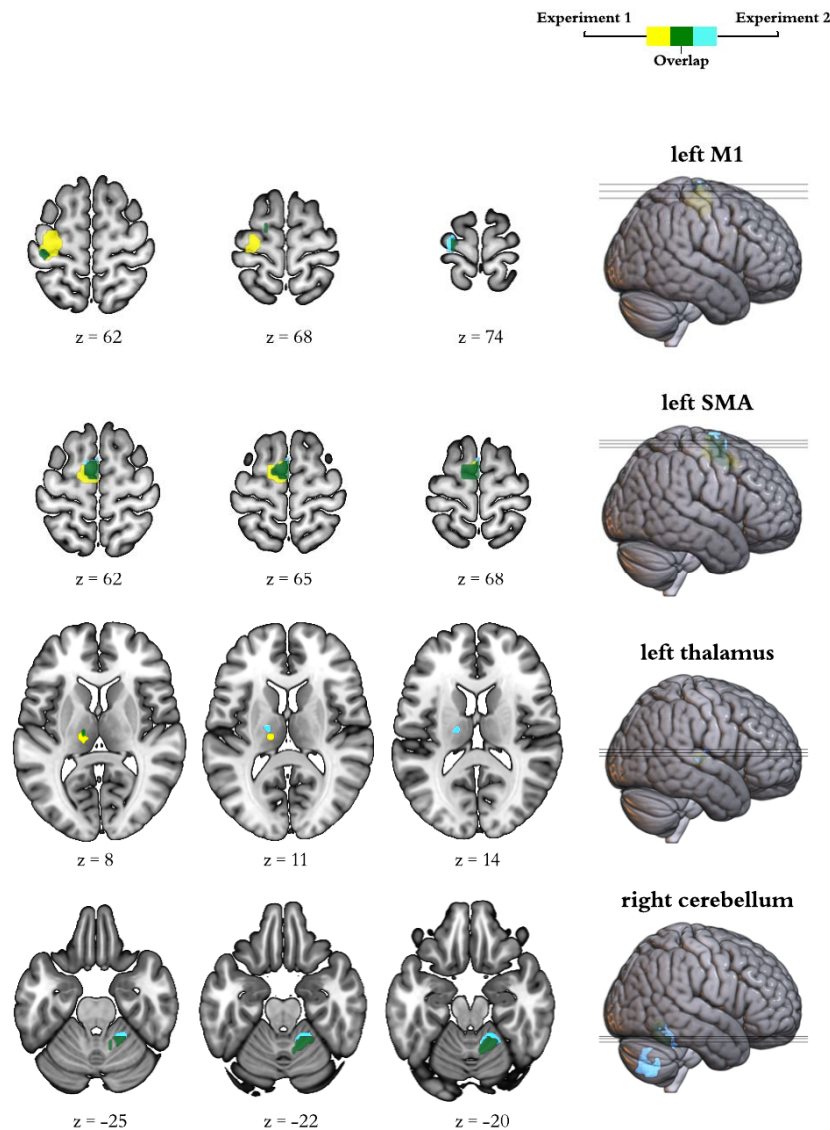

298  
299  
300  
301  
302  
303  
304  
305

**Fig. 3. Activation at Baseline.**

Brain activation during command following in the pre-stimulation run corresponding to the first session for each participant. The insets display group general linear model differences between 'move' and 'rest' blocks in Experiment 1 (yellow) and Experiment 2 (light blue). The overlap across experiments appears in green. For display purposes, activation maps are shown at an uncorrected  $p < 0.001$  and rendered on a standard template (152 template in MRICroGL). z indicates the Montreal Neurological Institute z coordinate.

306

### 307 2.7.1 Individual level DCM specification and definition of model space.

308 With the above extracted timeseries, we specified individual dynamic causal models using the  
309 deterministic model for fMRI, one-state per region, bilinear modulatory effects, and mean-centred inputs.  
310 We started with a 4-node fully connected model in which all self- and between region connections were  
311 switched on. The effect of thumb movements entered the model as modulatory input on the self-  
312 connection of each region, as this is recommended to improve both parameter identifiability and biological

313 interpretability [28]. In addition to the intrinsic connections and modulatory inputs above, DCM requires  
314 the specification of driving inputs, which briefly ‘ping’ specific regions in the network at the onset of each  
315 block. In order to determine the best set of inputs for our data, we first created DCMs that included driving  
316 inputs to all 4 regions in our model and applied Parametric Empirical Bayes (PEB) to prune any  
317 parameters that were not contributing to the model evidence. Briefly, PEB is a hierarchical Bayesian  
318 framework for group-level modelling of effective connectivity, that allows the evaluation of both group  
319 effects and between-subject variability over DCM parameters (see [29] for a full description). For this step,  
320 we created a second-level PEB modelling the commonalities across all 6 sessions for each participant.  
321 These were then fed to a third-level PEB that modelled the commonalities across the group. In addition to  
322 the constant encoding the group mean, we included sex, age, and the score in the Edinburgh  
323 Handedness Inventory as nuisance regressors (all mean-centered). Finally, we used Bayesian Inference  
324 to invert the model for each subject and estimate the parameters that maximise explanation of data while  
325 minimising complexity. For this, we used Bayesian Model Reduction (BMR) to search over the reduced  
326 models followed by Bayesian Model Average (BMA) to calculate the average connectivity parameters[29].  
327 We used a 95% posterior probability threshold for free-energy (i.e., comparing the evidence for all models  
328 where a particular connection / input is on, versus those where it is off). This step indicated strong support  
329 (>99% posterior probability) for including driving inputs to cortical regions (M1, and SMA) only (see results  
330 for full details) and therefore we re-defined DCMs for all of our participants using these parameters. Our  
331 final model therefore included all self- and between-region connections, modulatory inputs to each self-  
332 connection, and driving inputs to M1 and SMA.

333

### 334 2.7.2 PEB ANOVAs

335 To test the effects of tDCS on the model parameters (connections and task modulations), we first created  
336 3 second-level PEB models in each participant, which encoded the following pair-wise interactions: (1)  
337 greater increases after anodal stimulation as compared to sham (pre-tDCS < post-tDCS x anodal > sham  
338 sessions) and (2) greater increases after anodal stimulation as compared to cathodal (pre-tDCS < post-  
339 tDCS x anodal > cathodal), and (3) greater increases after cathodal stimulation as compared to sham  
340 (pre-tDCS < post-tDCS x cathodal > sham). Note that these contrasts also encode the opposite effects:  
341 e.g., PEB 1 can also be interpreted as greater decreases in sham as compared to anodal (pre-tDCS >  
342 post-tDCS x anodal < sham). Each subject specific PEB model was then entered into one of 3 third-level  
343 PEBs that encoded the commonalities across the group (mean) for each pairwise interaction, as well as  
344 sex, age, and handedness score.

345 We then used BMR and BMA to prune connections that do not contribute to the model evidence and  
346 estimate the parameters across all models for each of the connections that remain switched on. We  
347 thresholded our BMA results at a posterior probability > 95% (which is equivalent to a Bayes factor of 3)  
348 [29].

349

## 350 **2.8 Motion tracking**

351 We performed motion data analysis using a custom script on MATLAB 2017b. First, we calculated the  
352 Euclidean distance of the x-y position and applied a low-pass 15Hz filter to the data. We then identified  
353 the onset and end of the movement by looking at abrupt changes in the signal, using the matlab function  
354 *findchangepts*, which, given a vector x with N elements (in our case containing motion tracking data)  
355 returns the index at which the mean of x changes most significantly. We used the first and last change  
356 detected by *findchangepts* to determine when each movement started and ended. We excluded  
357 movements where no changes were detected, which could be due to participants not responding to the  
358 task or to the joystick not recording data. In *Experiment 1*, this resulted in the removal of 5 datasets from  
359 the motion tracking analysis, due to the joystick malfunctioning during recording in at least one of three  
360 sessions. Lastly, we calculated velocity and acceleration at each timepoint between the beginning and  
361 end of each movement and obtained the mean velocity and peak acceleration for the trial. Additionally,  
362 we calculated reaction time defined as the time occurring between the auditory stimulus (beep) and the  
363 onset of the movement. Finally, we averaged these values across each run and computed a 2 (pre- vs  
364 post-tDCS) x3 (polarity) repeated measures ANOVA to check for any effect of tDCS on behaviour.

365

## 366 **2.9 Blinding**

367 In order to assess whether our blinding protocol was successful, in each Experiment, we used McNemar's  
368 test to assess whether the number of correct judgements across the group about whether they had  
369 received tDCS or not was different between real stimulation and sham stimulation sessions.

370

## 371 **3. Results**

### 372 **3.1 Experiment 1 - Effects of M1-tDCS on brain activation and dynamics**

373 See the canonical task activation at baseline in Table 1 and Fig. 3.

374 Our factorial analysis on the individual activation maps revealed a significant interaction between polarity  
375 (anodal, cathodal, and sham) and time (pre-, post-tDCS) on the left thalamus only (uncorrected  $p < 0.001$ ;  
376 see Table S1 and Fig. 4). Subsequent pairwise interactions revealed that both anodal and cathodal  
377 stimulation increased activity in this area as compared to sham, with no significant differences between  
378 polarities. (See Supplementary Table S1 and Figure S1 for the positive effect of the task across all  
379 sessions in this ANOVA).

## Experiment 1

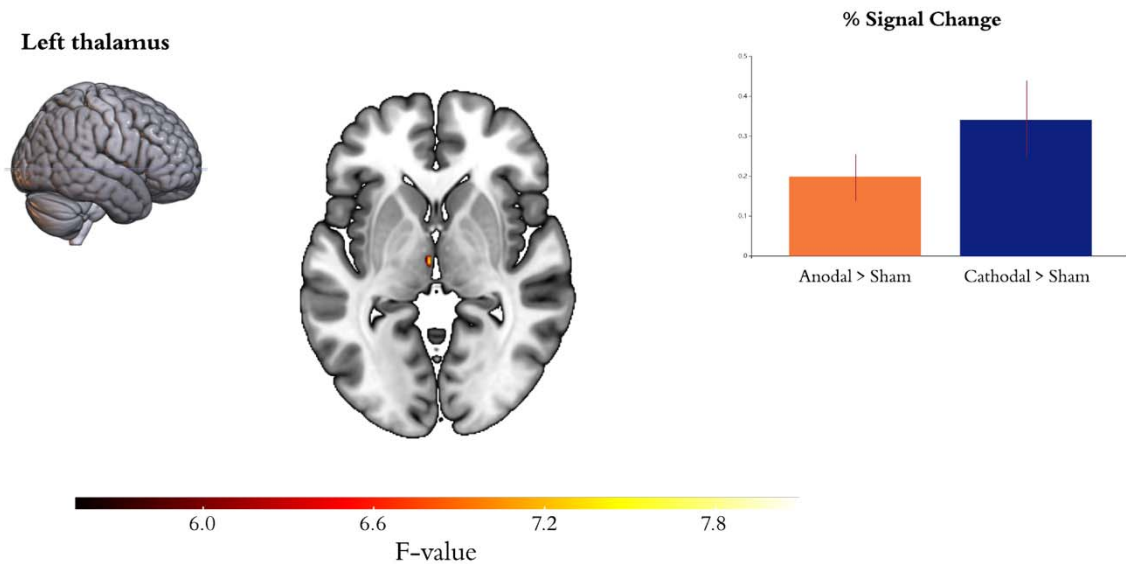

380

381

382

383

384

385

386

387

388

389

390

391

392

393

394

395

396

397

398

399

400

401

**Fig 4. Effects of tDCS on brain activation during command following for Experiments 1.** The brain inset display group general linear model (GLM) interactions between polarity (anodal, cathodal, sham) and time (pre-, post-tDCS) in the individual contrasts modelling brain activation during command following. For display purposes, activation maps are shown at an uncorrected  $p < 0.005$  and rendered on a standard template (152 template in MRICroGL). The colour bar represents the F value for the interaction in the GLM. z indicates the Montreal Neurological Institute z coordinate. Bar plots show the estimated effect size and 90% confidence intervals at the peak voxel for each pairwise contrast: greater activation after anodal stimulation as compared to sham (orange), and greater activation after cathodal stimulation as compared to sham (blue).

Our DCM analyses revealed that anodal stimulation of M1 reduced self-inhibition in the thalamus and led to a more inhibitory output from cerebellum to M1, compared to both sham and cathodal stimulation.

Additionally, as compared to sham, anodal stimulation increased inhibition in all outputs from M1 to the rest of the network but reduced inhibition from cerebellum to thalamus, as well as in SMA and cerebellar self-connections. These changes were however not polarity specific. In turn, cathodal stimulation increased excitation from thalamus to SMA, both as compared to sham and to anodal stimulation.

Additionally, as compared to sham, cathodal stimulation led to an increase in inhibition from both M1 and cerebellum to SMA, an increase in excitation from thalamus to M1, and a reduction in self-inhibition in SMA. In terms of task modulations, cathodal M1 stimulation increased the modulatory input from the task on M1 (i.e., increased M1 self-inhibition) both as compared to anodal stimulation and sham, and decreased the modulatory input from the task on SMA as compared to anodal stimulation (see Fig. 5).

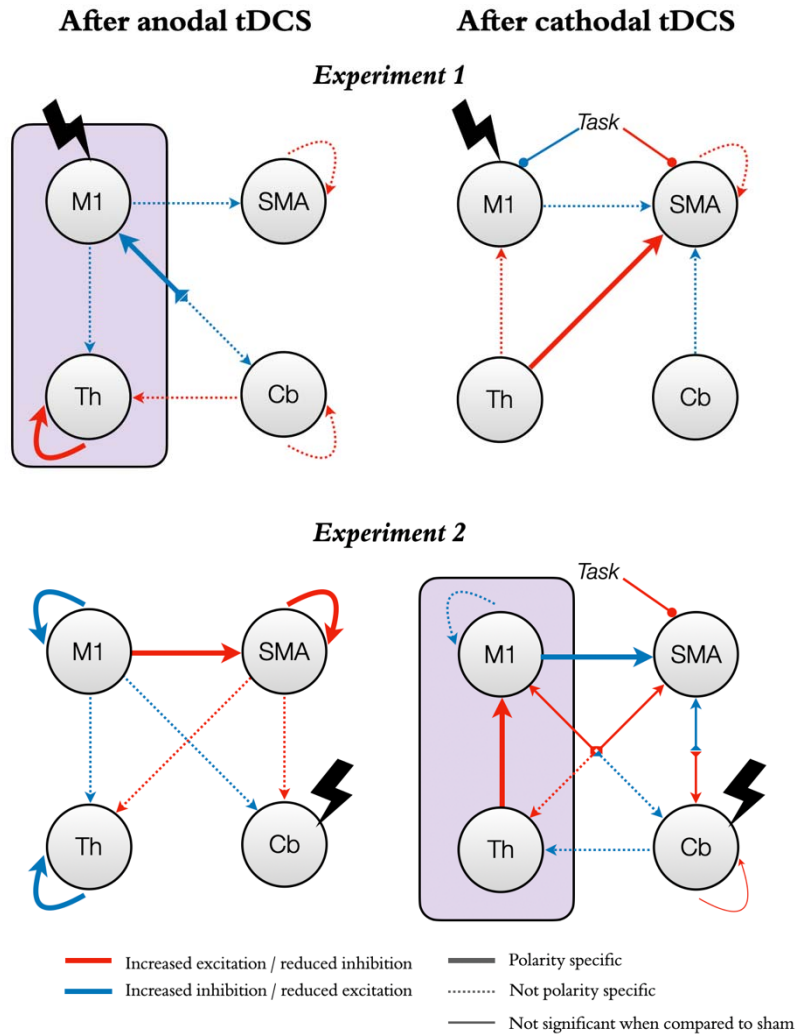

402  
403  
404  
405  
406  
407  
408  
409  
410  
411  
412  
413

**Fig 5. Effects of tDCS on functional neural dynamics with M1 or the cerebellum as targets.**

The figure shows the effects of tDCS on functional neural dynamics for the two experiments (experiment 1, top panels; experiment 2, bottom panels). The left and right panels represent changes after anodal and cathodal stimulation respectively. Red arrows indicate changes in the direction of increased excitation (or reduced inhibition). Blue arrows indicate changes in the direction of increased inhibition (or reduced excitation). Note that self-connections are always inhibitory and thus red indicates a reduction in inhibition rather than an excitatory role per se. Similarly, modulatory inputs from our command following task on each region increase (blue) or decrease (red) the region's inhibitory tone. Thick lines represent changes that are significant both as compared to the opposite polarity and to sham. Thin lines represent changes that are only significant as compared to the opposite polarity. Dashed lines represent changes that are only significant as compared to sham (not polarity specific). The purple boxes highlight our hypotheses for the M1-thalamus axis: anodal M1-tDCS (top left panel) reduced self-inhibition in the thalamus while cathodal cb-tDCS (bottom right panel) increased excitation from thalamus to M1, both in a polarity specific manner.

414

### 415 3.2 Experiment 2 - Effects of cb-tDCS on brain activation and causal dynamics

416 In terms of brain activity during command following, our factorial analysis revealed no significant  
417 interactions between polarity and time (pre- vs post-tDCS) in any of the ROIs. See Supplementary Table  
418 S1 and Figure S1 for the positive effect of the task across all sessions in this ANOVA.

419 In terms of effective connectivity, as predicted, cathodal stimulation led to increased excitation from  
420 thalamus to M1 both as compared to sham and anodal stimulation. In addition, it increased M1 self-  
421 inhibition as compared to sham but to a lesser extent than anodal stimulation. Finally, it increased



422 inhibition from M1 to SMA both as compared to sham and anodal stimulation (Fig. 5). When compared  
423 directly with anodal stimulation, cathodal cb-tDCS also decreased cerebellar self-inhibition and increased  
424 excitation from thalamus to SMA. Additionally, cathodal stimulation increased inhibition from M1 to  
425 cerebellum and from cerebellum to thalamus, and increased excitation from SMA to both thalamus and  
426 cerebellum, and from cerebellum to M1, as compared to sham. However, none of these changes were  
427 significant when compared with anodal stimulation. Finally, cathodal cb-tDCS decreased the effect of the  
428 task on SMA both as compared to sham and anodal stimulation. In contrast, anodal stimulation, when  
429 compared to sham and cathodal stimulation, led to increased self-inhibition in M1 and thalamus, reduced  
430 self-inhibition in SMA, as well as increased excitation from M1 to SMA. Additionally, anodal stimulation  
431 increased excitation from SMA to thalamus and cerebellum, and increased inhibition from M1 to  
432 cerebellum when compared to sham, but these changes were not polarity specific (i.e., did not reach  
433 statistical significance in the comparison between anodal and cathodal stimulation).

434

### 435 **3.3 Experiments 1 and 2 - Effects of tDCS on behaviour**

436 As expected, we did not find any interactions (polarity x time) for any of the metrics considered in  
437 Experiment 1 nor 2 (i.e., reaction time, mean velocity, and peak acceleration). In Experiment 2 only, we  
438 found a small main effect of time on average reaction times, which was 0.02 seconds (20 ms) faster in the  
439 second run as compared to baseline (pre-: 0.30s  $\pm$  0.04; post-tDCS: 0.28s  $\pm$  0.04;  $p < 0.001$  uncorrected,  
440  $\eta_p^2$  0.5). See Supplementary Table S2 for full statistical information for all main effects, interactions, and  
441 post hoc tests.

442

### 443 **3.4 Experiments 1 and 2 - Blinding**

444 We found no significant differences in the number of times that sham and active stimulation sessions  
445 were perceived as real in either experiment, suggesting that participants' experiences did not differ  
446 between active and sham stimulation sessions and blinding was successful (see Supplementary Table  
447 S3).

448

449

## 450 **4. Discussion**

451 Efforts to use tDCS as a therapeutic intervention in PDOC have had mixed success to date. While some  
452 studies showed very promising clinical improvements, many others failed to show any effects even after  
453 repeated sessions[30]. The field is thus unable to reach a consensus about whether tDCS would or would  
454 not be a feasible therapeutic avenue for this patient group as a result. Most research to date has focused  
455 on targeting the left frontal cortex, in an attempt to engage non-specific networks involved in arousal and  
456 awareness. Here, we propose a new therapeutic direction that directly addresses the neural mechanisms

457 that support measurable changes in behavioural responses after tDCS at the level of functional thalamo-  
458 cortical coupling within the motor network[12].

459 Our results provide the first evidence that tDCS over motor areas can distally modulate brain activity and  
460 causal dynamics in thalamo-cortico-cerebellar loops (beyond the immediate target area of stimulation)  
461 *during* behavioural command following, even when the stimulation is delivered at rest. In Experiment 1,  
462 anodal stimulation over M1 increased task-induced activation the thalamus. Our DCM analyses revealed  
463 that this is likely explained by reduced thalamic self-inhibition. In Experiment 2, cathodal cerebellar  
464 stimulation did not lead to changes in task-induced activity but instead led to increased excitatory  
465 influence from thalamus to M1. Taken together, these experiments demonstrate that it is possible to  
466 influence thalamo-cortical coupling indirectly via targeting *surface* (easily accessible) regions in the motor  
467 network. More importantly, they suggest that this could be a viable route to elicit clinically relevant  
468 changes in PDOC. Indeed, we designed our command-following task to emulate the approach that is  
469 routinely used in clinical settings to assess awareness after severe brain injury; namely asking the patient  
470 to perform a discrete movement in response to a verbal command[31]. This resulted in a task that was  
471 insensitive to potential tDCS modulations of behaviour in healthy participants but allowed us to study the  
472 neural effects of tDCS independently of performance, permitting us to draw more direct comparisons to  
473 the PDOC population. Specifically, our task deviated from those typically used in the motor learning  
474 literature (e.g., [32,33]) in three crucial points: the use of a very small number of trials (approximately 80-  
475 90% less), variable cue intervals to avoid prediction effects, and no feedback to participants. Further, we  
476 delivered stimulation at rest to increase the translatability of our results to unresponsive PDOC patients. It  
477 is important to highlight that the aim here was not to improve motor control in the healthy brain. Instead,  
478 we built upon convincing evidence that the thalamus is greatly inhibited in PDOC due to both structural  
479 and functional damage[34–36], resulting in less cortical excitation[36]. Our focus thus lay on  
480 compensating for this thalamic over-inhibition instead of enhancing normal function. We have previously  
481 shown that increased thalamic activity and excitation, as well as increased excitatory thalamus-M1  
482 coupling facilitates the production of motor responses to command in tasks like the one we used here[12].  
483 We now show that anodal tDCS over M1 and cathodal tDCS over the cerebellum can each modulate  
484 these dynamics, albeit in different ways, and we propose that they may allow PDOC patients to overcome  
485 motor control deficits at the root of their diminished behavioural responsiveness[12,13]. This in turn would  
486 allow more patients to demonstrate their true level of awareness, especially in those affected by so called  
487 cognitive motor dissociations[10]. Alongside ensuring that each patient receives an appropriate diagnosis,  
488 this increased responsiveness can also have important implications for prognosis by facilitating patients'  
489 engagement with rehabilitation[37]. Moreover, regaining some level of control over their thumb would  
490 facilitate the use of assistive devices (including those for communication), which could have an enormous  
491 impact on their quality of life. Indeed, to further increase the clinical relevance of our study, we focused on  
492 thumb movements, as they are affected by spasticity in fewer PDOC patients and with less severity as  
493 compared to other fingers[38].

494 Importantly, our results suggest two potential routes to target the thalamo-M1 axis, providing some  
495 flexibility to adapt the tDCS montage to the specific pattern of injuries present in each individual patient.  
496 Crucially, while many PDOC patients present localised structural damage to the white matter fibres  
497 connecting thalamus and M1[12,13], this damage is partial instead of a complete deafferentation[13]. This  
498 suggests the remaining pathways may be amenable to therapeutic intervention. In contrast, the white  
499 matter pathways connecting the cerebellum with the thalamus appear relatively preserved[13], suggesting  
500 that this may be a feasible route into the thalamus in the majority of PDOC patients. We have previously  
501 argued that the relative preservation of this pathway, in the context of damage to the thalamus and the  
502 white matter fibres connecting thalamus to M1, may be contributing to excessive thalamic inhibition[13].  
503 As discussed above, our current results show that cathodal cb-tDCS may be able to successfully  
504 counteract this. It is important to acknowledge here that, while both anodal M1 and cathodal cb-tDCS  
505 successfully modulated thalamic activity, there were differences in their respective effects over M1 activity  
506 and the thalamo-M1 dynamics. Furthermore, cathodal M1-tDCS also led to changes in thalamo-M1  
507 coupling in the desirable direction (increased coupling), alongside increases in thalamic activity. This  
508 adds further support to the now well accepted notion that the two polarities do not always result in  
509 opposing effects [7]. We include below discussion of potential compensatory mechanisms that may  
510 explain these effects, but we cannot rule out that cathodal M1-tDCS may also have therapeutic effects in  
511 some PDOC patients. We also note the possibility of simultaneous anodal-M1 and cathodal-cerebellar  
512 stimulation, although we have not tested this montage. In any case, further studies in PDOC patients  
513 themselves are required to test which of these modulations has greater therapeutic effect and for which  
514 specific patients. More broadly, while our results provide a robust proof-of-principle for the use of motor  
515 tDCS in PDOC, the specific dose, duration, and number of sessions required to induce reliable neural and  
516 behavioural changes in PDOC patients needs to be established. Further, the effects of tDCS are highly  
517 variable across individuals [39] and this heterogeneity can only be expected to be greater in PDOC  
518 patients, due to individual differences in brain damage affecting thalamo-cortical regions and their  
519 structural connectivity [13,35,40]. We report here group effects and thus our results cannot be interpreted  
520 in terms of M1 or cerebellar tDCS resulting in less (or more) individual variability as compared to other  
521 available interventions (e.g., DLFC). Indeed, an exploration of individual tDCS differences and their  
522 relationship to individual brain structure and white matter connectivity is beyond the scope of the current  
523 study but remains a crucial area of further investigation. By focusing on specific circuits that have a  
524 mechanistic role in PDOC, we believe our study provides a framework to study individual effects in a  
525 robust way.

526 To our knowledge, only 3 studies have targeted motor areas with tDCS in PDOC[41–43], in sharp  
527 contrast with the many others that have focused on the DLPFC, and currently represents the main  
528 direction in the field. These 3 motor studies included a combined total of 40 patients (14 VS and 26 MCS).  
529 Their small sample sizes, key differences in specific montages and stimulation parameters, alongside the  
530 focus on behaviour instead of neural markers, preclude us from drawing direct comparisons with our  
531 study. In addition, while we are satisfied that we were able to identify the optimal location of the

532 electrodes on the scalp to target the desired regions in our study, this is a much more challenging task in  
533 patients with severe brain injury, where large macrostructural changes will affect the relative position of  
534 the brain structures of interest in respect to the scalp. Nevertheless, PDOC studies provided preliminary  
535 evidence that M1 and cerebellar tDCS are well tolerated in this patient group and can indeed lead to  
536 specific improvements in motor responsiveness in a subset of patients (as indexed by increases in the  
537 motor and auditory CRS-R subscales).

538 Beyond the immediate implications for the rehabilitation of PDOC patients, our results speak for the ability  
539 of tDCS to influence long-range dynamics in the motor network during movement execution. The field of  
540 non-invasive brain stimulation has recently been tainted by a certain level of scepticism towards the  
541 effectiveness of tDCS, with some questioning whether it is indeed capable of modulating brain function at  
542 all[39]. The increasing number of well controlled imaging and electrophysiological studies has provided  
543 reassurance that tDCS can indeed modulate cortical regions under the electrodes. In the specific case of  
544 M1 stimulation, this is now well established. Here, we take this argument one step further, demonstrating  
545 that it can also lead to widespread distal modulations of cortico-subcortical loops when participants are  
546 engaged in a relevant cognitive task, and that such modulations do not require the participant to engage  
547 with the said task while receiving the stimulation itself. Specifically, our predicted changes to thalamo-  
548 cortical dynamics induced by anodal M1-tDCS (as discussed above), are consistent with, and expand, the  
549 now widely reported effects on M1 excitability[14] as well as more recently described changes to BOLD  
550 signal[15,44,45] and functional connectivity at rest[46–48]. In contrast, the effect of cerebellar tDCS on  
551 neural dynamics is much less understood. As discussed above, cathodal cb-tDCS increased thalamic  
552 afferent excitation over M1. In contrast, anodal stimulation led to increased self-inhibition in both M1 and  
553 thalamus. These findings demonstrate that tDCS is able to modulate cerebellar-brain inhibition (CBI) in a  
554 polarity specific manner, in agreement with previous electrophysiological reports[16], as well as a recent  
555 report of local increased activation in the dentate nuclei after cathodal cb-tDCS during simple finger  
556 tapping[49]. Furthermore, for the first time, we provide a window into the specific functional dynamics  
557 mediating these effects.

558 Interestingly, against our prediction, cathodal tDCS over M1 also led to an increase in thalamic activation  
559 and in excitation from thalamus to M1, as compared to sham. These changes further support the already  
560 described complex effects that characterise this polarity [7]. Specifically, cathodal tDCS is known to  
561 produce more inconsistent behavioural results than anodal stimulation, although these inconsistencies  
562 are more common in cognitive than motor studies [50]. Interestingly, our cathodal M1-tDCS also  
563 increased the modulatory effect of the task over M1 (i.e., led to greater M1 inhibition during the move  
564 blocks), but this was not accompanied by reductions in motor performance in the task. We believe this  
565 suggests that the thalamic changes reflect a compensatory mechanism to overcome cortical inhibition  
566 caused by cathodal M1-tDCS and to maintain an acceptable level of motor performance. This is in line  
567 with earlier animal models suggesting sustained effects of tDCS that are characterised by the system  
568 trying to compensate and normalise its activity to baseline levels (see [51] as discussed in [52]). Similarly,

569 in Experiment 2, cathodal stimulation over the cerebellum led to the expected increases in excitatory  
570 output from thalamus to M1, but also an unexpected increase in M1 self-inhibition. Once again, tDCS did  
571 not alter behavioural performance and thus we believe this cortical reduction also compensated for the  
572 excess excitation coming from the thalamus. Alongside determining whether these changes have a  
573 therapeutic effect, neuroimaging studies of tDCS in PDOC will help elucidate whether the effects of  
574 cathodal M1-tDCS and anodal cb-tDCS are indeed compensatory or can alter behaviour when a motor  
575 deficit is present. In either case, in showing polarity specific modulations for some but not all our results,  
576 our study speaks for the complexity of the effects of tDCS [39] and suggests that other active control  
577 conditions alongside polarity should be included in future studies.

578 Several limitations need to be acknowledged. First, the distribution of the current generated by  
579 conventional tDCS is characterised by very low spatial accuracy and can reach a widespread area  
580 beyond the intended target. As seen in the simulations provided in Fig. 1, our montages are no exception  
581 to this. Our simulations suggest that the delivered current did not reach the thalamus with either montage.  
582 Therefore, our reported effects for this structure are likely to be explained by modulations of network  
583 connectivity. However, simulations suggest that M1-tDCS generated similar levels of current in SMA to  
584 that of M1 itself, and thus we cannot rule out that some of our effects are mediated by SMA. In contrast,  
585 our modelled current distribution for cb-tDCS extended beyond cerebellum into occipital and ventral  
586 temporal regions. These areas are not associated with our motor command-following task and are  
587 therefore not likely to have driven our effects. In either case, while the lack of spatial specificity does not  
588 limit the potential clinical application of tDCS in PDOC, it should be considered when making inferences  
589 about causal links between elicited effects and specific brain areas. Future studies should consider using  
590 a montage targeting non motor regions to make stronger causal inferences about the role of specific  
591 areas. Additionally, high-definition tDCS (HD-tDCS) can achieve higher spatial precision [53]. However,  
592 as we have previously argued [30], the increased spatial precision of this method requires careful  
593 consideration of individual brain structure and tissue properties, especially in patients with severe brain  
594 damage, which might limit clinical applications of HD-tDCS in PDOC. Second, the effects of tDCS are  
595 highly dependent on the state of the target brain networks during stimulation [54], and are more effective  
596 when paired with a relevant task [55]. Using a task during stimulation also partially overcomes the above  
597 limitations in spatial accuracy in ensuring that the effects are maximal for the intended areas (amongst all  
598 areas receiving current). Additionally, while we encouraged our participants to remain awake and  
599 monitored them during the 20 minutes of tDCS, the lack of behavioural outputs inherent to rest scans  
600 precluded us from verifying their wakefulness levels. It is thus possible that some of our participants  
601 experienced variable levels of wakefulness that could result in further individual differences in their brain  
602 states. However, as discussed above, PDOC patients are unable to voluntarily engage in behavioural  
603 tasks and delivering the stimulation at rest remains the most feasible option. Future studies should  
604 consider alternative ways to modulate brain states when designing tDCS interventions for this challenging  
605 patient group (e.g., see [56]). Third, in Experiment 2, we increased our FOV to ensure a full coverage of  
606 the cerebellum for all participants, and this required a longer TR. The resulting reduced temporal

607 resolution that resulted may have affected our sensitivity to detect BOLD changes, compared to  
608 Experiment 1 [57]. We note that when all trials were included (e.g., see Fig. S1) the activation patterns  
609 were similar across both experiments, but this difference in sensitivity should be considered when making  
610 comparative arguments about effectiveness across our two montages. Importantly, DCM provides a more  
611 complete and sensitive account of differences in regional activation and their interactions, and can thus  
612 more reliably detect group differences [58]. Future studies with larger cohorts are required to clarify  
613 whether our proposed montages can elicit robust changes at the GLM level also.

614

## 615 **5. Conclusions**

616 In summary, our results indicate that tDCS can successfully modulate long-range thalamo-cortical  
617 dynamics underlying behavioural responsiveness during command following. It is yet to be tested whether  
618 these effects can be replicated in PDOC patients themselves and whether this will result in measurable  
619 clinical effects. However, our methodology can be directly applied to investigate this, and in doing so, it  
620 opens new avenues to explore the mechanisms of tDCS interventions in this challenging population.

621

## 622 **Data availability statement**

623 Processed data is available from the authors upon reasonable request. Please contact [d.fernandez-](mailto:d.fernandez-espejo@bham.ac.uk)  
624 [espejo@bham.ac.uk](mailto:d.fernandez-espejo@bham.ac.uk) with any questions or requests.

## 625 **Declarations of interest**

626 None

## 627 **Acknowledgements**

628 This work was supported by generous funding from the Medical Research Council (MR/P02596X/1; DF-  
629 E). DA was supported by a scholarship from The Wellington Hospital and the University of Birmingham.  
630 We thank Prof Michael Stevens for their advice on data cleaning, and all the volunteers for their time.

631

## 632 **Author Contributions**

633 DF-E designed the study and obtained funding. RJ, PT, and DFE collected the data. DA and DF-E  
634 analysed the data, interpreted the results, prepared the figures, and wrote the manuscript. CRM, PT  
635 contributed to the editing of the final draft. All authors approved the content of the manuscript.

## 636 References

- 637 [1] Liu A, Vöröslakos M, Kronberg G, Henin S, Krause MR, Huang Y, et al. Immediate  
638 neurophysiological effects of transcranial electrical stimulation. *Nat Commun* 2018;9.  
639 <https://doi.org/10.1038/s41467-018-07233-7>.
- 640 [2] The Multi-Society Task Force on PVS. Medical aspects of the persistent vegetative state (I). *N Engl J*  
641 *Med* 1994;330:1499–508.
- 642 [3] Thibaut A, Schiff N, Giacino J, Laureys S, Gosseries O. Therapeutic interventions in patients with  
643 prolonged disorders of consciousness. *Lancet Neurol* 2019;18:600–14.  
644 [https://doi.org/10.1016/S1474-4422\(19\)30031-6](https://doi.org/10.1016/S1474-4422(19)30031-6).
- 645 [4] Bourdillon P, Hermann B, Sitt JD, Naccache L. Electromagnetic Brain Stimulation in Patients With  
646 Disorders of Consciousness. *Front Neurosci* 2019;13:223. <https://doi.org/10.3389/fnins.2019.00223>.
- 647 [5] Thibaut A, Bruno M-A, Ledoux D, Demertzi A, Laureys S. tDCS in patients with disorders of  
648 consciousness: Sham-controlled randomized double-blind study. *Neurology* 2014.
- 649 [6] Martens G, Kroupi E, Bodien Y, Frasso G, Annen J, Cassol H, et al. Behavioral and  
650 electrophysiological effects of network-based frontoparietal tDCS in patients with severe brain  
651 injury: A randomized controlled trial. *NeuroImage Clin* 2020;28.  
652 <https://doi.org/10.1016/j.nicl.2020.102426>.
- 653 [7] Parkin BL, Ekhtiari H, Walsh VF. Non-invasive Human Brain Stimulation in Cognitive Neuroscience:  
654 A Primer. *Neuron* 2015;87:932–45. <https://doi.org/10.1016/j.neuron.2015.07.032>.
- 655 [8] Luppi AI, Craig MM, Pappas I, Finoia P, Williams GB, Allanson J, et al. Consciousness-specific  
656 dynamic interactions of brain integration and functional diversity. *Nat Commun* 2019;10:4616.  
657 <https://doi.org/10.1038/s41467-019-12658-9>.
- 658 [9] Demertzi A, Tagliazucchi E, Dehaene S, Deco G, Barttfeld P, Raimondo F, et al. Human  
659 consciousness is supported by dynamic complex patterns of brain signal coordination. *Sci Adv*  
660 2019;5:eaat7603. <https://doi.org/10.1126/sciadv.aat7603>.
- 661 [10] Schiff ND. Cognitive Motor Dissociation Following Severe Brain Injuries. *JAMA Neurol*  
662 2015;72:1413–5.
- 663 [11] Fernández-Espejo D, Owen AM. Detecting awareness after severe brain injury. *Nat Rev Neurosci*  
664 2013;14:801–9. <https://doi.org/10.1038/nrn3608>.
- 665 [12] Fernandez-Espejo D, Rossit S, Owen AM. A Thalamocortical Mechanism for the Absence of Overt  
666 Motor Behavior in Covertly Aware Patients. *JAMA Neurol* 2015;72:1–9.
- 667 [13] Stafford CA, Owen AM, Fernández-Espejo D. The neural basis of external responsiveness in  
668 prolonged disorders of consciousness. *NeuroImage Clin* 2019;22:101791.  
669 <https://doi.org/10.1016/j.nicl.2019.101791>.
- 670 [14] Nitsche MA, Paulus W. Excitability changes induced in the human motor cortex by weak transcranial  
671 direct current stimulation. *J Physiol* 2000;527:633–9. <https://doi.org/10.1111/j.1469-7793.2000.t01-1-00633.x>.
- 672 [15] Stagg CJ, O'Shea J, Kincses ZT, Woolrich M, Matthews PM, Johansen-Berg H. Modulation of  
673 movement-associated cortical activation by transcranial direct current stimulation. *Eur J Neurosci*  
674 2009;30:1412–23. <https://doi.org/10.1111/j.1460-9568.2009.06937.x>.
- 675 [16] Galea JM, Jayaram G, Ajagbe L, Celnik P. Modulation of cerebellar excitability by polarity-specific  
676 noninvasive direct current stimulation. *J Neurosci Off J Soc Neurosci* 2009;29:9115–22.
- 677 [17] Antal A, Alekseichuk I, Bikson M, Brockmüller J, Brunoni AR, Chen R, et al. Low intensity transcranial  
678 electric stimulation: Safety, ethical, legal regulatory and application guidelines. *Clin Neurophysiol Off*  
679 *J Int Fed Clin Neurophysiol* 2017;128:1774–809. <https://doi.org/10.1016/j.clinph.2017.06.001>.
- 680 [18] Oldfield RC. The assessment and analysis of handedness: The Edinburgh inventory.  
681 *Neuropsychologia* 1971;9:97–113. [https://doi.org/10.1016/0028-3932\(71\)90067-4](https://doi.org/10.1016/0028-3932(71)90067-4).
- 682 [19] Rossini PM, Burke D, Chen R, Cohen LG, Daskalakis Z, Di Iorio R, et al. Non-invasive electrical and  
683 magnetic stimulation of the brain, spinal cord, roots and peripheral nerves: Basic principles and  
684 procedures for routine clinical and research application. An updated report from an I.F.C.N.  
685 Committee. *Clin Neurophysiol Off J Int Fed Clin Neurophysiol* 2015;126:1071–107.  
686 <https://doi.org/10.1016/j.clinph.2015.02.001>.
- 687 [20] Galea JM, Vazquez A, Pasricha N, de Xivry J-JO, Celnik P. Dissociating the roles of the cerebellum  
688 and motor cortex during adaptive learning: the motor cortex retains what the cerebellum learns.  
689 *Cereb Cortex N Y N* 1991 2011;21:1761–70. <https://doi.org/10.1093/cercor/bhq246>.
- 690

- 691 [21] Woods A, Antal A, Bikson M, Boggio P, Brunoni A, Celnik P, et al. A technical guide to tDCS, and  
692 related non-invasive brain stimulation tools. *Clin Neurophysiol Off J Int Fed Clin Neurophysiol*  
693 2016;127:1031–48. <https://doi.org/10.1016/j.clinph.2015.11.012>.
- 694 [22] Jalali R, Chowdhury A, Wilson M, Miall RC, Galea JM. Neural changes associated with cerebellar  
695 tDCS studied using MR spectroscopy. *Exp Brain Res* 2018;236:997–1006.  
696 <https://doi.org/10.1007/s00221-018-5170-1>.
- 697 [23] Beckmann CF, Smith SM. Probabilistic independent component analysis for functional magnetic  
698 resonance imaging. *IEEE Trans Med Imaging* 2004;23:137–52.  
699 <https://doi.org/10.1109/TMI.2003.822821>.
- 700 [24] Griffanti L, Salimi-Khorshidi G, Beckmann CF, Auerbach EJ, Douaud G, Sexton CE, et al. ICA-based  
701 artefact and accelerated fMRI acquisition for improved Resting State Network imaging. *NeuroImage*  
702 2014;95:232–47. <https://doi.org/10.1016/j.neuroimage.2014.03.034>.
- 703 [25] Salimi-Khorshidi G, Douaud G, Beckmann CF, Glasser MF, Griffanti L, Smith SM. Automatic  
704 Denoising of Functional MRI Data: Combining Independent Component Analysis and Hierarchical  
705 Fusion of Classifiers. *NeuroImage* 2014;90:449–68.  
706 <https://doi.org/10.1016/j.neuroimage.2013.11.046>.
- 707 [26] Stoodley CJ, Valera EM, Schmahmann JD. Functional topography of the cerebellum for motor and  
708 cognitive tasks: an fMRI study. *NeuroImage* 2012;59:1560–70.  
709 <https://doi.org/10.1016/j.neuroimage.2011.08.065>.
- 710 [27] Maldjian JA, Laurienti PJ, Kraft RA, Burdette JH. An automated method for neuroanatomic and  
711 cytoarchitectonic atlas-based interrogation of fMRI data sets. *NeuroImage* 2003;19:1233–9.  
712 [https://doi.org/10.1016/S1053-8119\(03\)00169-1](https://doi.org/10.1016/S1053-8119(03)00169-1).
- 713 [28] Zeidman P, Jafarian A, Corbin N, Seghier ML, Razi A, Price CJ, et al. A guide to group effective  
714 connectivity analysis, part 1: First level analysis with DCM for fMRI. *NeuroImage* 2019;200:174–90.  
715 <https://doi.org/10.1016/j.neuroimage.2019.06.031>.
- 716 [29] Zeidman P, Jafarian A, Seghier ML, Litvak V, Cagnan H, Price CJ, et al. A guide to group effective  
717 connectivity analysis, part 2: Second level analysis with PEB. *NeuroImage* 2019;200:12–25.  
718 <https://doi.org/10.1016/j.neuroimage.2019.06.032>.
- 719 [30] Aloï D, della Rocchetta AI, Ditchfield A, Coulborn S, Fernández-Espejo D. Therapeutic Use of  
720 Transcranial Direct Current Stimulation in the Rehabilitation of Prolonged Disorders of  
721 Consciousness. *Front Neurol* 2021;12. <https://doi.org/10.3389/fneur.2021.632572>.
- 722 [31] Fernandez-Espejo D, Owen AM. Detecting awareness after severe brain injury. *Nat Rev Neurosci*  
723 2013;14:801–9.
- 724 [32] Hamada M, Galea JM, Lazzaro VD, Mazzone P, Ziemann U, Rothwell JC. Two Distinct Interneuron  
725 Circuits in Human Motor Cortex Are Linked to Different Subsets of Physiological and Behavioral  
726 Plasticity. *J Neurosci* 2014;34:12837–49. <https://doi.org/10.1523/JNEUROSCI.1960-14.2014>.
- 727 [33] Hannah R, Iacovou A, Rothwell JC. Direction of TDCS current flow in human sensorimotor cortex  
728 influences behavioural learning. *Brain Stimulat* 2019;12:684–92.  
729 <https://doi.org/10.1016/j.brs.2019.01.016>.
- 730 [34] Fernandez-Espejo D, Junque C, Bernabeu M, Roig-Rovira T, Vendrell P, Mercader JM. Reductions  
731 of thalamic volume and regional shape changes in the vegetative and the minimally conscious  
732 states. *J Neurotrauma* 2010;27:1187–93.
- 733 [35] Fernandez-Espejo D, Bekinschtein T, Monti MM, Pickard JD, Junque C, Coleman MR, et al. Diffusion  
734 weighted imaging distinguishes the vegetative state from the minimally conscious state.  
735 *NeuroImage* 2011;54:103–12.
- 736 [36] Schiff ND. Recovery of consciousness after brain injury: a mesocircuit hypothesis. *Trends Neurosci*  
737 2010;33:1–9.
- 738 [37] Elliott L, Walker L. Rehabilitation interventions for vegetative and minimally conscious patients.  
739 *Neuropsychol Rehabil* 2005;15:480–93.
- 740 [38] Zhang B, Karri J, O'Brien K, DiTommaso C, Kothari S, Li S. Spasticity Management in Persons with  
741 Disorders of Consciousness. *PM&R n.d.;n/a*. <https://doi.org/10.1002/pmrj.12458>.
- 742 [39] Filmer HL, Mattingley JB, Dux PE. Modulating brain activity and behaviour with tDCS: rumours of its  
743 death have been greatly exaggerated. *Cortex* 2019. <https://doi.org/10.1016/j.cortex.2019.10.006>.
- 744 [40] Lant ND, Gonzalez-Lara LE, Owen AM, Fernandez-Espejo D. Relationship between the anterior  
745 forebrain mesocircuit and the default mode network in the structural bases of disorders of  
746 consciousness. *NeuroImage Clin* 2016;10:27–35.



- 747 [41] Naro A, Russo M, Leo A, Cannavò A, Manuli A, Bramanti A, et al. Cortical connectivity modulation  
748 induced by cerebellar oscillatory transcranial direct current stimulation in patients with chronic  
749 disorders of consciousness: A marker of covert cognition? *Clin Neurophysiol* 2016;127:1845–54.  
750 <https://doi.org/10.1016/j.clinph.2015.12.010>.
- 751 [42] Martens G, Fregni F, Carrière M, Barra A, Laureys S, Thibaut A. Single tDCS session of motor cortex  
752 in patients with disorders of consciousness: a pilot study. *Brain Inj* 2019;33:1679–83.  
753 <https://doi.org/10.1080/02699052.2019.1667537>.
- 754 [43] Straudi S, Bonsangue V, Mele S, Craighero L, Montis A, Fregni F, et al. Bilateral M1 anodal  
755 transcranial direct current stimulation in post traumatic chronic minimally conscious state: a pilot  
756 EEG-tDCS study. *Brain Inj* 2019;33:490–5. <https://doi.org/10.1080/02699052.2019.1565894>.
- 757 [44] Baudewig J, Nitsche MA, Paulus W, Frahm J. Regional modulation of BOLD MRI responses to  
758 human sensorimotor activation by transcranial direct current stimulation. *Magn Reson Med Off J*  
759 *Soc Magn Reson Med Soc Magn Reson Med* 2001;45:196–201.
- 760 [45] Jang SH, Ahn SH, Byun WM, Kim CS, Lee MY, Kwon YH. The effect of transcranial direct current  
761 stimulation on the cortical activation by motor task in the human brain: an fMRI study. *Neurosci Lett*  
762 2009;460:117–20.
- 763 [46] Polania R, Paulus W, Nitsche MA. Modulating cortico-striatal and thalamo-cortical functional  
764 connectivity with transcranial direct current stimulation. *Hum Brain Mapp* 2012;33:2499–508.
- 765 [47] Sankarasubramanian V, Cunningham DA, Potter-Baker KA, Beall EB, Roelle SM, Varnerin NM, et al.  
766 Transcranial Direct Current Stimulation Targeting Primary Motor Versus Dorsolateral Prefrontal  
767 Cortices: Proof-of-Concept Study Investigating Functional Connectivity of Thalamocortical Networks  
768 Specific to Sensory-Affective Information Processing. *Brain Connect* 2017;7:182–96.  
769 <https://doi.org/10.1089/brain.2016.0440>.
- 770 [48] Cummiford CM, Nascimento TD, Foerster BR, Clauw DJ, Zubieta J-K, Harris RE, et al. Changes in  
771 resting state functional connectivity after repetitive transcranial direct current stimulation applied to  
772 motor cortex in fibromyalgia patients. *Arthritis Res Ther* 2016;18. <https://doi.org/10.1186/s13075-016-0934-0>.
- 774 [49] Küper M, Mallick JS, Ernst T, Kraff O, Thürling M, Stefanescu MR, et al. Cerebellar transcranial direct  
775 current stimulation modulates the fMRI signal in the cerebellar nuclei in a simple motor task. *Brain*  
776 *Stimulat* 2019;12:1169–76. <https://doi.org/10.1016/j.brs.2019.04.002>.
- 777 [50] Jacobson L, Koslowsky M, Lavidor M. tDCS polarity effects in motor and cognitive domains: a meta-  
778 analytical review. *Exp Brain Res* 2012;216:1–10. <https://doi.org/10.1007/s00221-011-2891-9>.
- 779 [51] Reato D, Rahman A, Bikson M, Parra LC. Low-Intensity Electrical Stimulation Affects Network  
780 Dynamics by Modulating Population Rate and Spike Timing. *J Neurosci* 2010;30:15067–79.  
781 <https://doi.org/10.1523/JNEUROSCI.2059-10.2010>.
- 782 [52] Jackson MP, Rahman A, Lafon B, Kronberg G, Ling D, Parra LC, et al. Animal Models of transcranial  
783 Direct Current Stimulation: Methods and Mechanisms. *Clin Neurophysiol Off J Int Fed Clin*  
784 *Neurophysiol* 2016;127:3425–54. <https://doi.org/10.1016/j.clinph.2016.08.016>.
- 785 [53] Morya E, Monte-Silva K, Bikson M, Esmaeilpour Z, Biazoli CE, Fonseca A, et al. Beyond the target  
786 area: an integrative view of tDCS-induced motor cortex modulation in patients and athletes. *J*  
787 *NeuroEngineering Rehabil* 2019;16:141. <https://doi.org/10.1186/s12984-019-0581-1>.
- 788 [54] Li LM, Violante IR, Leech R, Ross E, Hampshire A, Opitz A, et al. Brain state and polarity dependent  
789 modulation of brain networks by transcranial direct current stimulation. *Hum Brain Mapp*  
790 2019;40:904–15. <https://doi.org/10.1002/hbm.24420>.
- 791 [55] Bolognini N, Pascual-Leone A, Fregni F. Using non-invasive brain stimulation to augment motor  
792 training-induced plasticity. *J Neuroengineering Rehabil* 2009;6:8.
- 793 [56] Fernandez-Espejo D, Aloï D, Incisa della Rocchetta A, Hoad D, Greenwood R, Playford ED, Cruse D.  
794 Exploring the neural, behavioural, and clinical effects of transcranial direct current stimulation in  
795 patients with a Prolonged Disorder of Consciousness; protocol for a double-blind randomised  
796 crossover feasibility study 2020. <https://doi.org/10.21203/rs.3.rs-15515/v1>.
- 797 [57] Zeidman P, Kazan SM, Todd N, Weiskopf N, Friston KJ, Callaghan MF. Optimizing Data for Modeling  
798 Neuronal Responses. *Front Neurosci* 2019;12:986. <https://doi.org/10.3389/fnins.2018.00986>.
- 799 [58] Schuyler B, Ollinger JM, Oakes TR, Johnstone T, Davidson RJ. Dynamic Causal Modeling applied to  
800 fMRI data shows high reliability. *NeuroImage* 2010;49:603–11.  
801 <https://doi.org/10.1016/j.neuroimage.2009.07.015>.
- 802

803 **Supplementary Material**

804

805 **Table S1. Effect of M1-tDCS on brain activation.**

| Contrast                                                     | Region   | Cluster P            | Cluster size  | Peak P               |                    | F / T | MNI coordinates |
|--------------------------------------------------------------|----------|----------------------|---------------|----------------------|--------------------|-------|-----------------|
|                                                              |          | <i>FWE-corrected</i> | <i>in mm3</i> | <i>FWE-corrected</i> | <i>uncorrected</i> |       |                 |
|                                                              |          |                      |               |                      |                    |       | [x;y;z]         |
| <b>Interaction between polarity and time</b>                 | Thalamus | 0.967                | 54            | 0.965                | 0.001              | 8.092 | [-3;-16;-1]     |
| <b>Greater Increase after anodal as compared to cathodal</b> | SMA      | 0.886                | 108           | 0.790                | 0.000              | 3.550 | [-9;11;53]      |
|                                                              |          | 0.935                | 54            | 0.907                | 0.000              | 3.383 | [-9;20;56]      |
| <b>Greater increase after cathodal as compared to sham</b>   | Thalamus | 0.935                | 54            | 0.443                | 0.000              | 3.901 | [-3;-16;-1]     |
| <b>Greater increase after anodal as compared to sham</b>     | Thalamus | 0.999                | 189           | 0.993                | 0.001              | 3.069 | [-15;-25;-1]    |
|                                                              |          | 0.998                | 216           | 0.999                | 0.002              | 2.868 | [-6;-13;-1]     |

806

807 Results from the random effect group analyses on the brain activation during thumb movements to command. We only include

808 results that survive a threshold of  $p < 0.001$  uncorrected. In addition, we do not include spurious single voxel activations.

809 Abbreviations: FWE, family wise error; MNI, Montreal Neurological Institute; SMA, supplementary motor area.

810

811 **Table S2. Effects of tDCS on behavioural metrics**

| Metrics                       | Polarity | Baseline              | Post-tDCS              | $t_{(baseline\ vs\ post-tDCS)}$ | $p\text{-Holm}_{(baseline\ vs\ post-tDCS)}$ | $F_{(main\ effect\ time)}$ | $p_{(main\ effect\ time)}$ | $F_{(interaction)}$ | $p_{(interaction)}$ |
|-------------------------------|----------|-----------------------|------------------------|---------------------------------|---------------------------------------------|----------------------------|----------------------------|---------------------|---------------------|
| Experiment 1 - M1-tDCS        |          |                       |                        |                                 |                                             |                            |                            |                     |                     |
| Reaction time (s)             | Anodal   | 0.29 ( $\pm$ 0.06)    | 0.27 ( $\pm$ 0.05)     | <u>2.389</u>                    | <u>0.314</u>                                | <u>3.990</u>               | <u>0.063</u>               | 1.312               | 0.283               |
|                               | Cathodal | 0.27 ( $\pm$ 0.05)    | 0.26 ( $\pm$ 0.04)     | <u>0.626</u>                    | <u>1.0</u>                                  |                            |                            |                     |                     |
|                               | Sham     | 0.28 ( $\pm$ 0.05)    | 0.28 ( $\pm$ 0.07)     | <u>0.102</u>                    | <u>1.0</u>                                  |                            |                            |                     |                     |
| Mean Velocity (cm/s)          | Anodal   | 8.39 ( $\pm$ 3.98)    | 7.59 ( $\pm$ 2.81)     | <u>2.697</u>                    | <u>0.145</u>                                | <u>04.430</u>              | <u>0.051</u>               | 1.939               | 0.160               |
|                               | Cathodal | 7.71 ( $\pm$ 4.49)    | 7.26 ( $\pm$ 3.83)     | <u>0.868</u>                    | <u>1.0</u>                                  |                            |                            |                     |                     |
|                               | Sham     | 6.96 ( $\pm$ 3.14)    | 6.99 ( $\pm$ 2.83)     | <u>0.120</u>                    | <u>1.0</u>                                  |                            |                            |                     |                     |
| Peak acceleration ( $m/s^2$ ) | Anodal   | 31.05 ( $\pm$ 41.64)  | 37.31 ( $\pm$ 56.13)   | <u>0.312</u>                    | <u>1.0</u>                                  | <u>0.616</u>               | <u>0.444</u>               | 0.636               | 0.536               |
|                               | Cathodal | 32.81 ( $\pm$ 38.32)  | 24.11 ( $\pm$ 29.34)   | <u>0.325</u>                    | <u>1.0</u>                                  |                            |                            |                     |                     |
|                               | Sham     | 77.82 ( $\pm$ 177.01) | 111.39 ( $\pm$ 244.91) | <u>1.299</u>                    | <u>1.0</u>                                  |                            |                            |                     |                     |
| Experiment 2 - cb-tDCS        |          |                       |                        |                                 |                                             |                            |                            |                     |                     |
| Reaction time (s)             | Anodal   | 0.30 ( $\pm$ 0.04)    | 0.28 ( $\pm$ 0.04)     | 3.669                           | 0.008**                                     | <u>21.094</u>              | <u>&lt;0.001**</u>         | 0.951               | 0.395               |
|                               | Cathodal | 0.29 ( $\pm$ 0.03)    | 0.28 ( $\pm$ 0.04)     | <u>1.998</u>                    | <u>0.601</u>                                |                            |                            |                     |                     |
|                               | Sham     | 0.30 ( $\pm$ 0.05)    | 0.29 ( $\pm$ 0.05)     | <u>1.885</u>                    | <u>0.601</u>                                |                            |                            |                     |                     |

|                                                 |          |                  |                  |               |            |              |              |              |              |
|-------------------------------------------------|----------|------------------|------------------|---------------|------------|--------------|--------------|--------------|--------------|
| Mean Velocity<br>( <i>cm/s</i> )                | Anodal   | 7.44 (± 3.53)    | 7.78 (± 3.98)    | <u>0.626</u>  | <u>1.0</u> | <u>0.286</u> | <u>0.598</u> | <u>1.106</u> | <u>0.340</u> |
|                                                 | Cathodal | 7.11 (± 3.18)    | 6.38 (± 2.77)    | <u>-1.486</u> | <u>1.0</u> |              |              |              |              |
|                                                 | Sham     | 8.09 (± 2.73)    | 8.09 (± 2.55)    | <u>-0.007</u> | <u>1.0</u> |              |              |              |              |
| Peak acceleration<br>( <i>m/s<sup>2</sup></i> ) | Anodal   | 39.29 (± 31.94)  | 39.29 (± 33.62)  | <u>0.001</u>  | <u>1.0</u> | <u>1.823</u> | <u>0.191</u> | 0.404        | 0.670        |
|                                                 | Cathodal | 51.19 (± 96.90)  | 31.74 (± 15.27)  | <u>-0.372</u> | <u>1.0</u> |              |              |              |              |
|                                                 | Sham     | 77.82 (± 141.91) | 60.96 (± 108.44) | <u>-1.046</u> | <u>1.0</u> |              |              |              |              |

812 Statistics for the post hoc (baseline vs post-tDCS) tests, main effect of time, and interaction between polarity (anodal,  
813 cathodal, sham) and time (baseline vs post-tDCS) on average reaction time, mean velocity and peak acceleration for  
814 Experiment 1 and Experiment 2. p-Holm value adjusted for comparing a family of 15;  $p_{(\text{interaction})}$  uncorrected; \*\* $p < .01$ .  
815 Abbreviations: ms, milliseconds; cm, centimetres; s, seconds; m, metres.

816 **Table S3. Blinding**  
817

| Experiment   | Active Stimulation | Sham  | $\chi^2$ | p     |
|--------------|--------------------|-------|----------|-------|
| Experiment 1 | 31/43              | 15/22 | 0.9682   | 0.701 |
| Experiment 2 | 33/40              | 13/22 | 0.0869   | 0.263 |

818 Number of times that each type of stimulation was perceived as real, and statistics for the corresponding McNemar's  
819 Test. Active stimulation includes anodal and cathodal sessions.  
820

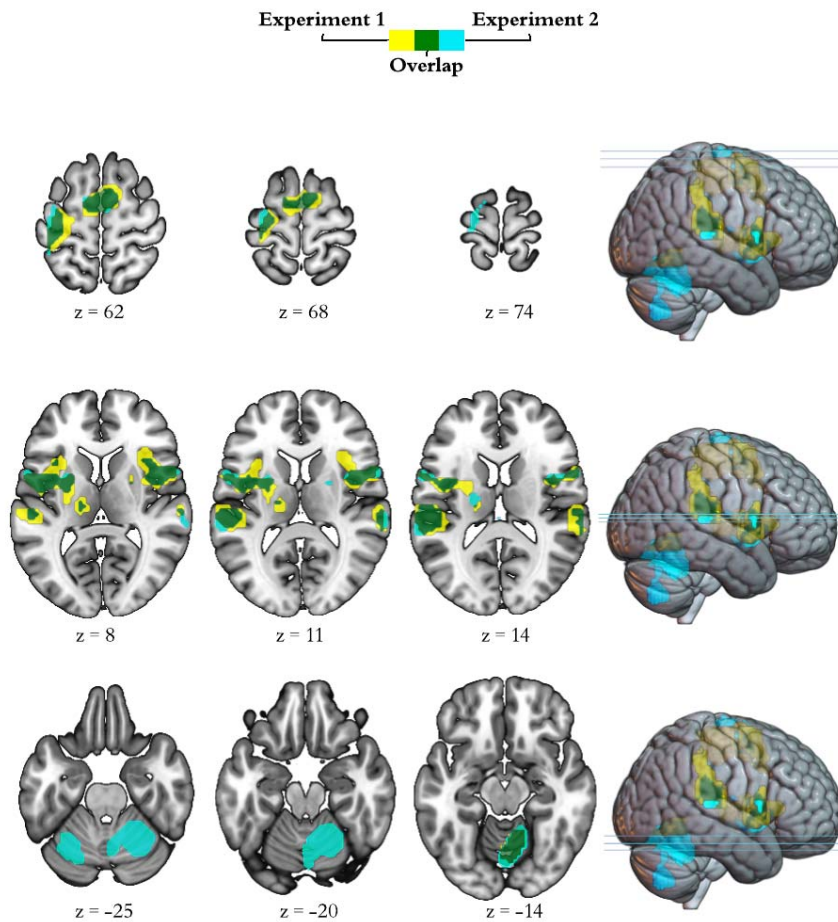

821 **Figure S1. Brain activation during command following across trials.**

822 The insets display group general linear model differences between 'move' and 'rest' blocks in Experiment 1 (yellow) and Experiment  
823 2 (light blue), across all trials included in the ANOVA (positive effect of task). The overlap across experiments appears in green. For  
824 display purposes, activation maps are shown at a FWE  $p < 0.05$  and rendered on a standard template (152 template in MRICroGL).  
825 We display whole brain results as per request during peer review. z indicates the Montreal Neurological Institute z coordinate.  
826
